# Supplementary material
Source: Frontiers journal article supplement (https://www.frontiersin.org/articles/256858)
Supplement: Table_1.XLSX [file Table_1.XLSX]

## Sheet: AllSample_GC_Q
SampleID	ReadSum	BaseSum	GC(%)	N(%)	Q20(%)	CycleQ20(%)	Q30(%)
BC1-001	2112034	422406800	39.39	0.06	93.39	100	88.45
BC1-002	2254999	450999800	39.13	0.06	93	100	87.8
BC1-003	2385887	477177400	39.25	0.06	93.39	100	88.23
BC1-004	2856003	571200600	39.08	0.06	93.29	100	88.25
BC1-005	1591621	318324200	39.72	0.06	93.26	100	88.31
BC1-006	2015138	403027600	39.47	0.07	93	100	87.79
BC1-007	2091654	418330800	38.93	0.06	93.44	100	88.35
BC1-008	2098690	419738000	39.39	0.07	93.81	100	89.06
BC1-009	2432521	486504200	39.15	0.06	93.4	100	88.41
BC1-010	2260816	452163200	39.76	0.06	93.21	100	88.11
BC1-011	2232828	446565600	39.45	0.06	93.5	100	88.59
BC1-012	2307156	461431200	39.34	0.06	93.7	100	88.88
BC1-013	2388778	477755600	39.65	0.06	93.83	100	89.12
BC1-014	2185054	437010800	39.36	0.07	94.09	100	89.53
BC1-015	1920486	384097200	39.35	0.06	92.86	100	87.55
BC1-016	2222678	444535600	39.16	0.06	92.24	100	86.68
BC1-017	2419475	483895000	39.2	0.06	93.08	100	87.84
BC1-018	2142757	428551400	39.51	0.06	92.76	100	87.55
BC1-019	2690268	538053600	39.5	0.06	93.81	100	88.91
BC1-020	2113583	422716600	39.45	0.06	93.92	100	89.03
BC1-021	2191872	438374400	39.27	0.06	93.77	100	88.94
BC1-022	2352513	470502600	39.18	0.06	93.5	100	88.57
BC1-023	2383210	476642000	39.25	0.06	91.84	100	85.96
BC1-024	2365865	473173000	39.98	0.06	93.43	100	88.38
BC1-025	2467490	493498000	39.59	0.06	92.27	100	86.4
BC1-026	2141254	428250800	39.92	0.07	93.51	100	88.65
BC1-027	2704304	540860800	40.17	0.06	93.29	100	88.19
BC1-028	2058836	411767200	39.16	0.06	93.33	100	88.32
BC1-029	2546521	509304200	39.42	0.06	93.49	100	88.52
BC1-030	2289628	457925600	39.14	0.06	93.37	100	88.44
BC1-031	2430725	486145000	39.06	0.06	93.42	100	88.4
BC1-032	2285077	457015400	39.44	0.06	93.47	100	88.52
BC1-033	2151660	430332000	39.27	0.06	93.67	100	88.8
BC1-034	2206346	441269200	39.79	0.06	93.91	100	89.11
BC1-035	2172495	434499000	39.34	0.06	93.65	100	88.79
BC1-036	2266597	453319400	39.24	0.06	93.39	100	88.38
BC1-037	1876835	375367000	39.87	0.06	93.71	100	88.89
BC1-038	2699783	539956600	39.28	0.06	93.02	100	87.75
BC1-039	2343042	468608400	39.39	0.06	92.04	100	86.26
BC1-040	1973194	394638800	39.29	0.06	93.35	100	88.25
BC1-041	2205336	441067200	38.9	0.06	93.52	100	88.53
BC1-042	2115600	423120000	38.81	0.07	93.57	100	88.61
BC1-043	2361325	472265000	39.28	0.06	93.41	100	88.38
BC1-044	1840835	368167000	39.28	0.06	93.58	100	88.69
BC1-045	2381188	476237600	39.17	0.06	93.8	100	89.03
BC1-046	2481260	496252000	41.14	0.06	92.84	100	87.53
BC1-047	2248603	449720600	39.86	0.06	93.18	100	88.1
BC1-048	2080972	416194400	39.04	0.06	93.54	100	88.66
BC1-049	2090598	418119600	39.13	0.06	93.57	100	88.68
BC1-050	2238807	447761400	39.01	0.06	93.74	100	88.9
BC1-051	2011417	402283400	39.27	0.07	93.69	100	88.83
BC1-052	1724470	344894000	39.48	0.07	93.79	100	89.13
BC1-053	2262457	452491400	39.23	0.06	91.99	100	86.2
BC1-054	1809727	361945400	39.77	0.07	91.94	100	86.22
BC1-055	2011486	402297200	39.71	0.06	91.69	100	85.84
BC1-056	2001325	400265000	39.38	0.06	93.25	100	88.3
BC1-057	1798324	359664800	39.83	0.07	91.79	100	85.95
BC1-058	2158565	431713000	39.47	0.06	93.06	100	88.01
BC1-059	2292051	458410200	39.19	0.06	91.98	100	86.11
BC1-060	2150042	430008400	39.43	0.07	92.86	100	87.47
BC1-061	1803239	360647800	39.35	0.06	93.56	100	88.6
BC1-062	1900620	380124000	39.7	0.06	93.27	100	88.11
BC1-063	1905271	381054200	39.37	0.07	93.04	100	87.75
BC1-064	2171456	434291200	39.29	0.06	93	100	87.72
BC1-065	2184462	436892400	39.64	0.07	93.53	100	88.63
BC1-066	1915650	383130000	39.5	0.06	93.28	100	88.08
BC1-067	1501494	300298800	39.97	0.07	92.86	100	87.54
BC1-068	1712934	342586800	39.73	0.06	93.65	100	88.84
BC1-069	1983735	396747000	39.04	0.06	93.47	100	88.55
BC1-070	2066380	413276000	38.95	0.07	93.64	100	88.76
BC1-071	1918525	383705000	39.24	0.06	93.5	100	88.55
BC1-072	2159950	431990000	39.19	0.06	93.35	100	88.2
BC1-073	2808537	561707400	40.52	0.06	92.55	100	86.91
BC1-074	1772487	354497400	39.64	0.06	93.31	100	88.24
BC1-075	2050770	410154000	40.56	0.06	92.79	100	87.4
BC1-076	892224	178444800	40.23	0.07	93.72	100	88.99
BC1-077	1718574	343714800	39.98	0.07	92.66	100	87.15
BC1-078	2084812	416962400	39.45	0.06	93.15	100	87.94
BC1-079	2176143	435228600	39.3	0.06	92.75	100	87.29
BC1-080	1672241	334448200	39.83	0.06	92.72	100	87.17
BC1-081	2365993	473198600	41.03	0.06	92.43	100	86.73
BC1-082	2221362	444272400	39.5	0.06	93.34	100	88.26
BC1-083	2204357	440871400	39.09	0.07	93.52	100	88.55
BC1-084	1935993	387198600	39.45	0.06	93.94	100	89.23
BC1-085	2684376	536875200	39	0.06	93.67	100	88.76
BC1-086	2221425	444285000	39.6	0.07	93.58	100	88.66
BC1-087	2119029	423805800	39.29	0.06	93.71	100	88.84
BC1-088	2401305	480261000	39.13	0.06	93.65	100	88.74
BC1-089	2120152	424030400	39.23	0.05	93.37	100	88.3
BC1-090	2139745	427949000	38.89	0.06	93.17	100	88.03
BC1-091	2081863	416372600	39.53	0.06	93.8	100	89
BC1-092	1978653	395730600	39.28	0.06	93.25	100	88.23
BC1-093	2224730	444946000	39.27	0.06	92.95	100	87.75
BC1-094	2230308	446061600	39.28	0.06	93.12	100	87.97
BC1-095	2219988	443997600	39.17	0.06	93.31	100	88.25
BC1-096	2360686	472137200	39.18	0.06	93.52	100	88.54
BC1-097	2369347	473869400	39.04	0.06	93.23	100	88.12
BC1-098	2273829	454765800	38.83	0.06	93.35	100	88.35
BC1-099	2420307	484061400	38.85	0.06	93.27	100	88.21
BC1-100	2259298	451859600	39.2	0.06	93.31	100	88.15
BC1-101	2248405	449681000	39.37	0.06	93.7	100	88.85
BC1-102	2685936	537187200	40.71	0.06	93.46	100	88.43
BC1-103	2401373	480274600	39.12	0.06	93.52	100	88.57
BC1-104	2627470	525494000	39.7	0.06	93.72	100	88.84
BC1-105	2285353	457070600	39.3	0.06	93.52	100	88.61
BC1-106	2282200	456440000	39.07	0.06	93.56	100	88.69
BC1-107	2224337	444867400	39.15	0.06	93.51	100	88.51
BC1-108	2385087	477017400	39.37	0.06	93.76	100	88.92
BC1-109	2884565	576913000	41.67	0.05	93.06	100	87.76
BC1-110	2030243	406048600	39.27	0.06	93.33	100	88.28
BC1-111	2887083	577416600	39.02	0.06	93.66	100	88.72
BC1-112	2287039	457407800	39.07	0.06	93.81	100	88.96
BC1-113	2499046	499809200	39.19	0.06	93.59	100	88.71
BC1-114	2127971	425594200	39.47	0.06	93.12	100	87.98
BC1-115	2625799	525159800	39.06	0.06	93.39	100	88.41
BC1-116	2094268	418853600	39.24	0.06	93.12	100	88
BC1-117	2208134	441626800	39.11	0.06	93.62	100	88.73
BC1-118	2330365	466073000	39.16	0.06	93.01	100	87.77
BC1-119	2047995	409599000	39.37	0.06	93.33	100	88.3
BC1-120	2162362	432472400	39.2	0.06	93.09	100	87.95
BC1-121	2421653	484330600	39.21	0.06	92.94	100	87.63
BC1-122	2118002	423600400	39.12	0.06	92.92	100	87.7
BC1-123	2333241	466648200	39.19	0.06	92.84	100	87.58
BC1-124	2435116	487023200	39.12	0.06	93.09	100	87.89
BC1-125	2537937	507587400	39.75	0.06	93.15	100	87.91
BC1-126	1953503	390700600	39.86	0.06	92.16	100	86.46
BC1-127	2084537	416907400	39.5	0.06	91.82	100	86
BC1-128	2301436	460287200	39.17	0.06	92.34	100	86.73
BC1-129	1894201	378840200	39.42	0.06	92.45	100	86.83
BC1-130	2407319	481463800	39.32	0.06	92.26	100	86.62
BC1-131	2201530	440306000	39.46	0.06	92.16	100	86.41
BC1-132	2456664	491332800	39.12	0.06	92.12	100	86.4
BC1-133	2312612	462522400	39.18	0.06	92.41	100	86.81
BC1-134	2368952	473790400	39.07	0.06	92.68	100	87.16
BC1-135	2108748	421749600	39.36	0.06	92.47	100	86.87
BC1-136	2462897	492579400	39.42	0.06	92.33	100	86.63
BC1-137	2196205	439241000	39	0.05	93.03	100	87.77
BC1-138	2111167	422233400	39.36	0.06	92.33	100	86.7
BC1-139	2500165	500033000	39.38	0.06	92.98	100	87.65
BC1-140	2486211	497242200	39.02	0.06	92.63	100	87.06
BC1-141	2283858	456771600	39.06	0.05	93.28	100	88.13
BC1-142	2270219	454043800	39.49	0.06	93.34	100	88.24
BC1-143	2378636	475727200	39.15	0.06	93.22	100	88
BC1-144	2116367	423273400	39.42	0.06	91.75	100	85.78
BC1-145	2144105	428821000	39.26	0.06	92.32	100	86.63
BC1-146	2083717	416743400	39.42	0.06	92.02	100	86.2
BC1-147	1583061	316612200	39.69	0.06	92.61	100	87.16
BC1-148	2093879	418775800	39.15	0.06	93.18	100	87.99
BC1-149	2637744	527548800	39.08	0.06	92.08	100	86.25
BC1-150	2346071	469214200	39.2	0.06	92.92	100	87.67
Total	331081095	66216219000	39.4037	0.0609333	93.1413	100	87.9738
